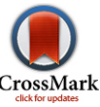

## Correction

# Correction: Change of Body Weight and Macrophage Inhibitory Cytokine-1 during Chemotherapy in Advanced Gastric Cancer: What Is Their Clinical Significance?

## The PLOS ONE Staff

The affiliation for the Academic Editor is incorrect.

The correct affiliation for Academic Editor Yuan-Jia Chen is:  
Department of Gastroenterology, Peking Union Medical College  
Hospital, Peking Union Medical College, Beijing, China

## Reference

1. Lu Z, Yang L, Yu J, Lu M, Zhang X, et al. (2014) Change of Body Weight and Macrophage Inhibitory Cytokine-1 during Chemotherapy in Advanced Gastric Cancer: What Is Their Clinical Significance? PLoS ONE 9(2): e88553. doi:10.1371/journal.pone.0088553

**Citation:** The PLOS ONE Staff (2014) Correction: Change of Body Weight and Macrophage Inhibitory Cytokine-1 during Chemotherapy in Advanced Gastric Cancer: What Is Their Clinical Significance? PLoS ONE 9(5): e97385. doi:10.1371/journal.pone.0097385

**Published:** May 7, 2014

**Copyright:** © 2014 The PLOS ONE Staff. This is an open-access article distributed under the terms of the Creative Commons Attribution License, which permits unrestricted use, distribution, and reproduction in any medium, provided the original author and source are credited.
